# Supplementary material for: Chromatin-bound CRM1 recruits SET-Nup214 and NPM1c onto HOX clusters causing aberrant HOX expression in leukemia cells
Source: eLife. 2019 Nov 22;8:e46667. doi: 10.7554/eLife.46667 (PMC6874418; doi:10.7554/eLife.46667)
Supplement: Supplementary file 1. [file elife-46667-supp1.xlsx]

## Sheet: Sheet1
Gene	Forward primer	Reverse primer	Reference
qPCR
HOXA9	GGTGACTGTCCCACGCTTGAC	GAGTGGAGCGCGCATGAAG	PMID: 15774621
HOXA11	GATTTTGATGAGCGTGGTCC	CAATGGCGTACTCTCTGAAGG	PMID: 15774621
HOXB4	TTTTCAGCTTTGGCGAAGATG	ACCGAGGCCCGTCTTCTC	PMID: 21245294
HOXB9	AGGCCGTGCTGTCTAATCAAA	CGAGCGTGCAGCCAGTT	PMID: 21245294
GAPDH	TGCACCACCAACTGCTTAGC	GGCATGGACTGTGGTCATGAG	Gene Ther Mol Biol 12:15-24, 2008
ChIP-qPCR
HOXA4A5	GAGAGTGCAGAGCATTGTGG	CTGGGAGCCCCGTTTATAGT	This study	intergenic region
HOXA9	AGGAGTCGCTGCTTTCTGTT	ATTAGAACGGGGAGGGGTAA	PMID: 24051379	promoter
HOXB4	CGAAAGCCCTCCTACTTACTGTC	GGAAATAAACCTCTTTGGCTGG	This study	promoter
HOXB4(en)	GCCAGATGATATAGGGCCCC	AAGGTGGGGAAATGGGGTTC	PMID: 27755609	enhancer
HOXB9	CCACCGACTGGCTTCCTCGC	CCAGGGGTCACACCTCCCCA	PMID: 23273982	promoter
