# Supplementary material for: Chromatin-bound CRM1 recruits SET-Nup214 and NPM1c onto HOX clusters causing aberrant HOX expression in leukemia cells
Source: eLife. 2019 Nov 22;8:e46667. doi: 10.7554/eLife.46667 (PMC6874418; doi:10.7554/eLife.46667)
Supplement: Supplementary file 2. [file elife-46667-supp2.xlsx]

## Sheet: Sheet1
Reagent type	Designation	Source or reference		Identifiers		Additional information
(species) or resource
Cell line (H. sapiens)	LOUCY	DSMZ		ACC 394, RRID:CVCL_1380
Cell line (H. sapiens)	OCI-AML3	DSMZ		ACC 582, RRID:CVCL_1844
Cell line (H. sapiens)	MEGAL	DSMZ		ACC 719, RRID:CVCL_1833
Cell line (H. sapiens)	K562	JCRB Cell Bank		JCRB0019, RRID:CVCL_0004
Cell line (H. sapiens)	HL60	JCRB Cell Bank		JCRB0085, RRID:CVCL_0002
Cell line (H. sapiens)	HEL	JCRB Cell Bank		JCRB0062, RRID:CVCL_0001
Cell line (M. musculus)	EB3	PMID: 11839818, PMID: 15147275		RRID:CVCL_J647		provided by Dr. Hitoshi Niwa (Kumamoto University, JAPAN)
Cell line (M. musculus)	E14tg2a	PMID: 3821905		RRID:CVCL_9108		provided by Dr. Hitoshi Niwa (Kumamoto University, JAPAN)
Cell line (M. musculus)	EB3 NPM1	This study				EB3 stably expressing FLAG(x3)-NPM1
Cell line (M. musculus)	EB3 NPM1ｃ	This study				EB3 stably expressing FLAG(x3)-NPM1c
Cell line (M. musculus)	E14tg2a CRM1-FLAG #2-2	This study				E14tg2a expressing C-terminally FLAG-tagged endogenous CRM1 with four amino acids deletion (ΔHEIP)
Cell line (M. musculus)	E14tg2a CRM1-FLAG #2-34	This study				E14tg2a expressing C-terminally FLAG-tagged endogenous CRM1
Antibody	anti-CRM1 (rabbit monoclonal)	CST		46249		ChIP, WB (1:2000)
Antibody	anti-CRM1 (rabbit polyclonal)	Bethyl Laboratories		A300-469A		ChIP, WB (1:2000)
Antibody	anti-CRM1 (mouse monoclonal)	BD Transduction Laboratories		611833		IF (1:500), WB (1:1000)
Antibody	anti-CRM1 (rabbit polyclonal)	SantaCruz		sc-5595		WB (1:1000)
Antibody	anti-Nup214 (rabbit polyclonal)	Bethyl Laboratories		A300-716A		ChIP, WB(1:1000)
Antibody	anti-Nup214 (rabbit polyclonal)	Bethyl Laboratories		IHC-00103		IF (1:500)
Antibody	anti-NPM1(mutant)(rabbit polyclonal)	ThermoFischer		PA1-46356		ChIP, IP, WB(1:1000)
Antibody	anti-NPM1 (mouse monoclonal)	Abcam		ab10530		IP, WB (1:2000)
Antibody	anti-RNA Pol II (S2P) (rat monoclonal)	BMC Genomics. 2011;12:516		clone 3E7C7		ChIP
Antibody	anti-RNA Pol II (S5P) (rat monoclonal)	BMC Genomics. 2011;12:516		clone 1H4B6		ChIP
Antibody	FLAG (M2) (mouse monoclonal)	Sigma		F1804		ChIP, IF (1:1000)
Antibody	anti-GAPDH (mouse monoclonal)	MBL		M171-3		WB (1:2000)
Antibody	Rabbit anti-Rat IgG antibody	Jackson Immuno Research		312-005-045		ChIP
Antibody	Alexa 488 Donkey anti-Mouse IgG	Termo Fischer Scientific		A21202		IF (1:400)
Antibody	Alexa 488 Donkey anti-Rabbit IgG	Termo Fischer Scientific		A21206		IF (1:400)
Antibody	Alexa 594 Donkey anti-Rabbit IgG	Termo Fischer Scientific		A21207		IF (1:400)
Other	DAPI	DOJINDO		D523		(1:10000)
Recombinant DNA reagent	pT2A-CMH (plasmid)	PMID: 26740045
Recombinant DNA reagent	pT2A-CMH-FLAG(x3)NPM1 (plasmid)	This study				N-terminally FLAG(x3)-tagged NPM1(WT)
Recombinant DNA reagent	pT2A-CMH-FLAG(x3)NPM1c (plasmid)	This study				N-terminally FLAG(x3)-tagged NPM1c (mutant)
Recombinant DNA reagent	pCAGGS-m2TP	PMID: 26740045				provided by Dr. Koichi Kawakami (NIG, JAPAN)
Recombinant DNA reagent	pX330-U6-Chimeric_BB-CBh-hSpCas9	addgene		42230
Recombinant DNA reagent	pX330-mXPO1	This study				sgRNA targeting mXPO1
Recombinant DNA reagent	pCAS9-mcherry (frame +0)	addgene		66939
Recombinant DNA reagent	pCRISPAINT-3XFLAG-PuroR	addgene		80973
Recombinant DNA reagent	pCRISPAINT-3XFLAG-PuroR-mXPO1	This study
Chemical compound, drug	KPT330	Selleck Chemicals		S7252
Chemical compound, drug	DMSO	WAKO		045-24511
Chemical compound, drug	Hygromycin B solution	WAKO		084-7681
Chemical compound, drug	Leptomycin B	LC laboratories		L-6100
Chemical compound, drug	Nucleofector Kit V	Lonza		VCA-1003		Nucleofector™ 2b (AAB-1001) was used.
Chemical compound, drug	Protein G sepharose 4 Fast Flow	GE Health care		17061801
Chemical compound, drug	ProLong™ Gold Antifade Mountant	Termo Fischer Scientific		P36934
Chemical compound, drug	Chemi-Lumi One Super	Nakalai Tesque		02230
Chemical compound, drug	GeneAce SYBR® qPCR Mix α Low ROX	Nippon Gene		316-07693
Chemical compound, drug	Micrococcal nuclease	Worthington Biochemical		LS004797
Chemical compound, drug	Dynabeads™ M-280 Sheep Anti-Mouse IgG	Termo Fischer Scientific		11201D
Chemical compound, drug	Dynabeads™ M-280 Sheep Anti-Rabbit IgG	Termo Fischer Scientific		11203D
Sequence-based reagent	qPCR and ChIP-qPCR Primers	This study				Supplementary file 1
Sequence-based reagent	SET siRNA	PMID: 15930275				5’-AUGGAAAUCUGGAAAGGAUTT-3’ 5’-AUCCUUUCCAGAUUUCCAUTT-3’
Sequence-based reagent	Control siRNA	Nippon gene				Universal negative control siRNA (21 mer)
Commercial assay or kit	SMARTer® ThruPLEX® DNA-seq 96D Kit	Rubicon Genomics		R400407
Commercial assay or kit	ReliaPrep RNA Miniprep Systems	Promega		Z6012
Commercial assay or kit	PrimeScript™ RT reagent Kit	Takara Bio		RR037A
